# Supplementary material
Source: PubMed Central journal article supplement (PMC3471742)
Supplement: supp_M112.392142_jbc.M112.392142-1.pdf [file supp_M112.392142_jbc.M112.392142-1.pdf]

Supplementary Table 1. The list of 201 pre-selected potential and known influenza antiviral agents.

|     | <b>Compound</b>       | <b>Cellular target</b> | <b>Supplier</b> | <b>Reference</b> |
|-----|-----------------------|------------------------|-----------------|------------------|
| 1.  | Obatoclox             | Bcl-2-like proteins    | Selleck         | (1-3)            |
| 2.  | NVP-AUY922            | HSP90                  | ChemieTek       | (4,5)            |
| 3.  | 17-DMAG               | HSP90                  | Selleck         |                  |
| 4.  | 17-AAG (Geldanamycin) | HSP90                  | Selleck         |                  |
| 5.  | BIIB021               | HSP90                  | Selleck         |                  |
| 6.  | Celastrol             | HSP90                  | DTP/NCI         |                  |
| 7.  | Paclitaxel            | Tubulin                | DTP/NCI         | (6,7)            |
| 8.  | Patupilone            | Tubulin                | LC labs         |                  |
| 9.  | ABT-751               | Tubulin                | Selleck         |                  |
| 10. | Docetaxel             | Tubulin                | LC labs         |                  |
| 11. | Indibulin             | Tubulin                | Tocris          |                  |
| 12. | Vinblastine           | Tubulin                | DTP/NCI         |                  |
| 13. | Vincristine           | Tubulin                | DTP/NCI         |                  |
| 14. | Ixabepilone           | Tubulin                | DTP/NCI         |                  |
| 15. | Oncovin               | Tubulin                | DTP/NCI         |                  |
| 16. | Wiskostatin           | N-WASP                 | Sigma           |                  |
| 17. | Vinorelbine           | p38 MAPK               | DTP/NCI         | (8)              |
| 18. | Doramapimod           | p38 MAPK               | Axon            |                  |
| 19. | S-trityl-L-cysteine   | Eg5                    | DTP/NCI         | (9)              |
| 20. | Sirolimus             | FKBP12/mTOR            | DTP/NCI         |                  |
| 21. | Everolimus            | mTOR                   | LC labs         |                  |
| 22. | Temsirolimus          | FKBP12/mTOR            | LC labs         |                  |
| 23. | OSI-027               | mTOR                   | ChemieTek       |                  |
| 24. | AZD8055               | mTOR                   | ChemieTek       |                  |
| 25. | XL765                 | mTOR/PI3K              | ChemieTek       |                  |
| 26. | PF-04691502           | mTOR/PI3K              | ChemieTek       |                  |
| 27. | NVP-BEZ235            | PI3K                   | LC labs         | (10)             |
| 28. | GDC-0941              | PI3K                   | LC labs         |                  |
| 29. | CAL-101               | PI3K                   | ChemieTek       |                  |
| 30. | XL147                 | PI3K                   | ChemieTek       |                  |
| 31. | Wortmannin            | PI3K                   | DTP/NCI         |                  |
| 32. | BMS-754807            | IGF-1R                 | ChemieTek       | (10)             |
| 33. | Carfilzomib           | Proteasome             | ChemieTek       |                  |
| 34. | Bortezomib            | Proteasome             | DTP/NCI         |                  |
| 35. | Fasudil               | Rho kinase/PKA/PKG/PRK | LC labs         | (11)             |
| 36. | Bryostatin 1          | PKC                    | Tocris          |                  |
| 37. | Enzastaurin           | PKC                    | LC labs         |                  |
| 38. | Midostaurin           | PKC                    | LC labs         |                  |
| 39. | Ruboxistaurin         | PKC                    | Axon            |                  |
| 40. | Sotrastaurin          | PKC                    | Axon            |                  |
| 41. | UCN-01                | PKC                    | Sigma           |                  |
| 42. | Zoledronic acid       | PKC                    | DTP/NCI         |                  |
| 43. | MK-2206               | Akt                    | ChemieTek       | (12)             |
| 44. | Alvocidib             | Cdk                    | Selleck         | (9,13)           |
| 45. | PD 0332991            | Cdk                    | Selleck         |                  |
| 46. | Roscovitine           | Cdk                    | LC labs         |                  |
| 47. | SNS-032               | Cdk                    | Selleck         |                  |
| 48. | MK1775                | Wee1                   | Axon            |                  |
| 49. | AZD 7762              | CHK1                   | Axon            |                  |
| 50. | PF-477736             | CHK1                   | Axon            | (13)             |
| 51. | TG003                 | CLK-1                  | Calbiochem      |                  |
| 52. | BI 2536               | PLK-1                  | Selleck         | (13,14)          |
| 53. | AT9283                | TK                     | Selleck         |                  |
| 54. | Ponatinib             | TK                     | Selleck         |                  |
| 55. | Sunitinib             | TK                     | DTP/NCI         |                  |
| 56. | Canertinib            | TK                     | LC labs         |                  |

|      |                             |                    |           |            |
|------|-----------------------------|--------------------|-----------|------------|
| 57.  | Bosutinib                   | Abl/Src kinases    | LC labs   |            |
| 58.  | Saracatinib                 | Abl/ Src kinases   | LC labs   |            |
| 59.  | Danuserib                   | FGFR1/Abl/Ret/Trka | Selleck   |            |
| 60.  | MLN8237                     | Aurora A kinase    | ChemieTek |            |
| 61.  | AZD1152-HQPA                | Aurora B kinase    | ChemieTek |            |
| 62.  | Berbamine                   | Bcr-Abl TK         | DTP/NCI   |            |
| 63.  | OSI-906                     | IGF1R/IR           | ChemieTek |            |
| 64.  | Caffeine                    | ATM/ATR kinase     | DTP/NCI   |            |
| 65.  | Dovitinib                   | FGFR               | Selleck   | (9)        |
| 66.  | Celecoxib                   | COX-2              | DTP/NCI   | (15,16)    |
| 67.  | Rofecoxib                   | COX-2              | DTP/NCI   |            |
| 68.  | Apocynin                    | NOX-2              | DTP/NCI   | (17)       |
| 69.  | AS703026                    | MEK                | Selleck   | (18)       |
| 70.  | GSK1120212                  | MEK                | ChemieTek |            |
| 71.  | RDEA119                     | MEK                | ChemieTek |            |
| 72.  | ARRY-142886                 | MEK                | Selleck   |            |
| 73.  | Vemurafenib                 | MEK/B-Raf          | ChemieTek |            |
| 74.  | Gemfibrozil                 | PPAR $\alpha$      | Sigma     | (10,19,20) |
| 75.  | APR-246                     | p53                | Tocris    | (21)       |
| 76.  | JNJ 26854165 (Serdemetan)   | p53                | Selleck   |            |
| 77.  | Pseudourea                  | p53                | DTP/NCI   |            |
| 78.  | YM155                       | p53                | ChemieTek |            |
| 79.  | Acricidine                  | NF- $\kappa$ B/p53 | DTP/NCI   |            |
| 80.  | Helena                      | NF- $\kappa$ B     | DTP/NCI   |            |
| 81.  | Ammonium tetrathiomolybdate | NF- $\kappa$ B     | DTP/NCI   |            |
| 82.  | Midodrine hydrochloride     | $\alpha$ -Ars      | Sigma     | (22)       |
| 83.  | 2-methoxyestradiol          | HIF-1 $\alpha$     | DTP/NCI   | (23)       |
| 84.  | Abiraterone                 | CYP17A1            | Selleck   | (13)       |
| 85.  | Pilocarpine                 | CYP 2A5            | DTP/NCI   |            |
| 86.  | Mitotane                    | CYP3A              | DTP/NCI   |            |
| 87.  | Belinostat                  | HDAC               | ChemieTek | (24)       |
| 88.  | Entinostat                  | HDAC               | LC labs   |            |
| 89.  | CI-994                      | HDAC               | LC labs   |            |
| 90.  | Vorinostat                  | HDAC               | LC labs   |            |
| 91.  | Panobinostat                | HDAC               | LC labs   |            |
| 92.  | Allopurinol                 | Xanthine oxidase   | DTP/NCI   | (25)       |
| 93.  | Anagrelide                  | PDE-3/PLA2         | DTP/NCI   | (26)       |
| 94.  | Afatinib                    | EGFR               | Selleck   | (27,28)    |
| 95.  | Erlotinib HCl               | EGFR               | DTP/NCI   |            |
| 96.  | CUDC-101                    | HDAC/EGFR/HER2     | Selleck   |            |
| 97.  | Gefitinib                   | EGFR               | DTP/NCI   |            |
| 98.  | Lapatinib                   | HER2/EGFR          | DTP/NCI   |            |
| 99.  | PD153035                    | EGRF               | Selleck   |            |
| 100. | Masitinib                   | RTKS               | LC labs   | (29-31)    |
| 101. | Imatinib                    | RTKs               | DTP/NCI   |            |
| 102. | Nilotinib                   | RTKs               | LC labs   |            |
| 103. | Dasatinib                   | RTKs               | LC labs   |            |
| 104. | Motesanib                   | RTKs               | Selleck   |            |
| 105. | Sorafenib                   | RTKs               | LC labs   |            |
| 106. | Axitinib                    | RTKs               | LC labs   |            |
| 107. | Cediranib                   | RTKs               | DTP/NCI   |            |
| 108. | Foretinib                   | RTKs               | Selleck   |            |
| 109. | MGCD-265                    | RTKs               | Selleck   |            |
| 110. | Pazopanib                   | RTKs               | LC labs   |            |
| 111. | Vatalanib                   | RTKs               | LC labs   |            |
| 112. | Regorafenib                 | RTKs               | Selleck   |            |
| 113. | Tivozanib                   | RTKs               | ChemieTek |            |
| 114. | Vandetanib                  | RTKs               | Selleck   |            |

|      |                     |                          |           |         |
|------|---------------------|--------------------------|-----------|---------|
| 115. | Tandutinib          | RTKs                     | LC labs   |         |
| 116. | AG-879              | RTKs                     | Enzo      |         |
| 117. | AC220               | Flt3                     | ChemieTek |         |
| 118. | Bimatoprost         | PGF synthase             | LC labs   | (32)    |
| 119. | Crizotinib          | ALK/c-Met                | Selleck   | (27)    |
| 120. | EMD1214063          | c-Met                    | ChemieTek |         |
| 121. | Lestaurtinib        | FLT3/JAK2/TrkA/TrkB/TrkC | LC labs   | (33)    |
| 122. | LY2784544           | JAK2                     | Selleck   |         |
| 123. | Ruxolitinib         | JAK1,2                   | ChemieTek |         |
| 124. | Tasocitinib         | JAK3/JAK2(V617F)         | LC labs   |         |
| 125. | Fingolimod          | S1PR                     | LC labs   | (34,35) |
| 126. | Fulvestrant         | ER                       | DTP/NCI   | (36)    |
| 127. | Raloxifene HCl      | ER                       | DTP/NCI   |         |
| 128. | Tamoxifen citrate   | ER                       | DTP/NCI   |         |
| 129. | Nilutamide          | AR                       | DTP/NCI   |         |
| 130. | Flutamide           | AR                       | DTP/NCI   |         |
| 131. | Goserelin           | AR                       | DTP/NCI   |         |
| 132. | Aminoglutethimide   | Steroids                 | DTP/NCI   |         |
| 133. | Methylprednisolone  | GR                       | DTP/NCI   | (37,38) |
| 134. | Dexamethasone       | GR                       | DTP/NCI   |         |
| 135. | Prednisolone        | GR                       | DTP/NCI   |         |
| 136. | Imiquimod           | TLR-7                    | DTP/NCI   | (39,40) |
| 137. | AG-014699           | PARP                     | Axon      | (41)    |
| 138. | Iniparib            | PARP                     | Axon      |         |
| 139. | Olaparib            | PARP                     | LC labs   |         |
| 140. | Veliparib           | PARP                     | Selleck   |         |
| 141. | Beta-lapachone      | PARP                     | DTP/NCI   |         |
| 142. | XAV-939             | PARP                     | Selleck   |         |
| 143. | Pemetrexed          | TS, DHFR and GARFT       | LC labs   | (42)    |
| 144. | Plerixafor          | CXCR4                    | Cayman    | (43)    |
| 145. | Tarenflurbil        | $\gamma$ -secretase      | Cayman    | (44)    |
| 146. | Thalidomide         | Caspase 8                | DTP/NCI   | (45)    |
| 147. | Tipifarnib          | Farnesyltransferase      | Selleck   | (46)    |
| 148. | Lenalidomide        | Immunomodulatory         | LC labs   | (16)    |
| 149. | Glycyrrhizinic acid | Anti-inflammatory        | DTP/NCI   |         |
| 150. | Paracetamol         | Anti-inflammatory        | DTP/NCI   |         |
| 151. | Aspirin             | Anti-inflammatory        | DTP/NCI   |         |
| 152. | Mesalazine          | Anti-inflammatory        | DTP/NCI   |         |
| 153. | Betulinic acid      | Anti-inflammatory        | DTP/NCI   |         |
| 154. | 3-Methyladenine     | Autophagy                | DTP/NCI   | (47)    |
| 155. | Lucanthone          | Autophagy                | DTP/NCI   |         |
| 156. | Hycanthone          | Acetylcholinesterase     | DTP/NCI   | (48)    |
| 157. | Ribavirin           | IMP dehydrogenase        | DTP/NCI   | (49)    |
| 158. | Leupeptin           | Protease                 | DTP/NCI   | (50)    |
| 159. | Tyrphostin A9       | PDGF receptor TK         | DTP/NCI   | (29)    |
| 160. | KN-93               | CAMK2B                   | Sigma     | (9)     |
| 161. | TOFA                | ACC                      | Enzo      | (51)    |
| 162. | Piperlongumine      | ROS                      | Indofine  | (52)    |
| 163. | Vitamin C           | ROS                      | DTP/NCI   |         |
| 164. | Auranofin           | TrxR                     | DTP/NCI   |         |
| 165. | Wiscostatin         | N-WASP                   | Sigma     | (53)    |
| 166. | Hydroxyurea         | RNR                      | DTP/NCI   | (54)    |
| 167. | Gemcitabine-HCl     | RNR/pol                  | Selleck   |         |
| 168. | Dactinomycin        | RNA pol                  | DTP/NCI   |         |
| 169. | Cytarabine HCl      | DNA/RNA pol              | DTP/NCI   |         |
| 170. | Nelarabine          | DNA/RNA                  | Sequoia   |         |
| 171. | Mercaptopurine      | DNA/RNA synthesis        | DTP/NCI   |         |
| 172. | Pipobroman          | DNA                      | DTP/NCI.  |         |

|      |                    |                         |         |        |
|------|--------------------|-------------------------|---------|--------|
| 173. | Plicamycin         | RNA synthesis           | DTP/NCI |        |
| 174. | NSC401575          | RNA synthesis           | DTP/NCI |        |
| 175. | Doxorubicin HCl    | DNA/RNA synthesis       | DTP/NCI |        |
| 176. | Vitamin B12        | DNA synthesis           | DTP/NCI |        |
| 177. | Daunomycin         | DNA/RNA synthesis       | DTP/NCI |        |
| 178. | Capecitabine       | DNA synthesis           | LC labs |        |
| 179. | Methoxsalen        | DNA synthesis           | DTP/NCI |        |
| 180. | Leflunomide        | Pyrimidine biosynthesis | Alexis  |        |
| 181. | Decitabine         | DNA methyl transferase  | Selleck |        |
| 182. | Azacitidine        | DNA methyl transferase  | DTP/NCI |        |
| 183. | Amonafide          | Topoisomerase/DNA       | Selleck |        |
| 184. | Irinotecan         | Topoisomerase I         | LC labs | (6,55) |
| 185. | Topotecan          | Topoisomerase I         | DTP/NCI |        |
| 186. | Camptothecin       | Topoisomerase I         | DTP/NCI |        |
| 187. | Thioguanine        | Topoisomerase I         | DTP/NCI |        |
| 188. | Idarubicin         | Topoisomerase II        | DTP/NCI |        |
| 189. | Etoposide          | Topoisomerase II        | DTP/NCI |        |
| 190. | Mitoxantrone       | Topoisomerase II        | LC labs |        |
| 191. | Dexrazoxane        | Topoisomerase II        | DTP/NCI |        |
| 192. | Teniposide         | Topoisomerase II        | DTP/NCI |        |
| 193. | Valrubicin         | Topoisomerase II        | DTP/NCI |        |
| 194. | Podophyllotoxin    | Topoisomerase I/II      | DTP/NCI |        |
| 195. | Pentostatin        | Adenosine deaminase     | DTP/NCI | (56)   |
| 196. | Cladribine         | Adenosine deaminase     | DTP/NCI |        |
| 197. | Fluorouracil       | Thymidylate synthase    | DTP/NCI | (57)   |
| 198. | Leucovorin calcium | DHFR                    | DTP/NCI | (58)   |
| 199. | Methotrexate       | DHFR                    | DTP/NCI |        |
| 200. | N-acetylcysteine   | Platelet aggregation    | DTP/NCI | (25)   |
| 201. | Saliphenylhalamide | vATPase                 | *       | (59)   |

\*-provided by De Brabander JK from Department of Biochemistry, University of Texas Southwestern Center at Dallas, Dallas, TX, USA.

- Chen, Z., Ni, D., Gao, Y., and Lin, J. (2007) *Lin chuang er bi yan hou tou jing wai ke za zhi = Journal of clinical otorhinolaryngology, head, and neck surgery* **21**, 510-512
- Olsen, C. W., Kehren, J. C., Dybdahl-Sissoko, N. R., and Hinshaw, V. S. (1996) *Journal of virology* **70**, 663-666
- Gaur, P., Ranjan, P., Sharma, S., Patel, J. R., Bowzard, J. B., Rahman, S. K., Kumari, R., Gangappa, S., Katz, J. M., Cox, N. J., Lal, R. B., Sambhara, S., and Lal, S. K. (2012) *The Journal of biological chemistry* **287**, 15109-15117
- Brough, P. A., Aherne, W., Barril, X., Borgognoni, J., Boxall, K., Cansfield, J. E., Cheung, K. M., Collins, I., Davies, N. G., Drysdale, M. J., Dymock, B., Eccles, S. A., Finch, H., Fink, A., Hayes, A., Howes, R., Hubbard, R. E., James, K., Jordan, A. M., Lockie, A., Martins, V., Massey, A., Matthews, T. P., McDonald, E., Northfield, C. J., Pearl, L. H., Prodromou, C., Ray, S., Raynaud, F. I., Roughley, S. D., Sharp, S. Y., Surgenor, A., Walmsley, D. L., Webb, P., Wood, M., Workman, P., and Wright, L. (2008) *Journal of medicinal chemistry* **51**, 196-218
- Chase, G., Deng, T., Fodor, E., Leung, B. W., Mayer, D., Schwemmler, M., and Brownlee, G. (2008) *Virology* **377**, 431-439
- Henter, J. I., Palmkvist-Kaijser, K., Holzgraefe, B., Bryceson, Y. T., and Palmer, K. (2010) *Lancet* **376**, 2116
- Rindler, M. J., Ivanov, I. E., and Sabatini, D. D. (1987) *The Journal of cell biology* **104**, 231-241
- Nencioni, L., De Chiara, G., Sgarbanti, R., Amatore, D., Aquilano, K., Marocci, M. E., Serafino, A., Torcia, M., Cozzolino, F., Ciriolo, M. R., Garaci, E., and Palamara, A. T. (2009) *The Journal of biological chemistry* **284**, 16004-16015
- Konig, R., Stertz, S., Zhou, Y., Inoue, A., Hoffmann, H. H., Bhattacharyya, S., Alamares, J. G., Tscherne, D. M., Ortigoza, M. B., Liang, Y., Gao, Q., Andrews, S. E., Bandyopadhyay, S., De Jesus, P., Tu, B. P., Pache, L., Shih, C., Orth, A., Bonamy, G., Miraglia, L., Ideker, T., Garcia-Sastre, A., Young, J. A., Palese, P., Shaw, M. L., and Chanda, S. K. (2010) *Nature* **463**, 813-817

10. Zhou, Z., Jiang, X., Liu, D., Fan, Z., Hu, X., Yan, J., Wang, M., and Gao, G. F. (2009) *Autophagy* **5**, 321-328
11. Dudek, S. E., Luig, C., Pauli, E. K., Schubert, U., and Ludwig, S. (2010) *Journal of virology* **84**, 9439-9451
12. Ehrhardt, C., Wolff, T., Pleschka, S., Planz, O., Beermann, W., Bode, J. G., Schmolke, M., and Ludwig, S. (2007) *Journal of virology* **81**, 3058-3067
13. Karlas, A., Machuy, N., Shin, Y., Pleissner, K. P., Artarini, A., Heuer, D., Becker, D., Khalil, H., Ogilvie, L. A., Hess, S., Maurer, A. P., Muller, E., Wolff, T., Rudel, T., and Meyer, T. F. (2010) *Nature* **463**, 818-822
14. Heikkinen, L. S., Kazlauskas, A., Melen, K., Wagner, R., Ziegler, T., Julkunen, I., and Saksela, K. (2008) *The Journal of biological chemistry* **283**, 5719-5727
15. Carey, M. A., Bradbury, J. A., Reboloso, Y. D., Graves, J. P., Zeldin, D. C., and Germolec, D. R. (2010) *PloS one* **5**, e11610
16. Darwish, I., Mubareka, S., and Liles, W. C. (2011) *Expert review of anti-infective therapy* **9**, 807-822
17. Vlahos, R., Stambas, J., Bozinovski, S., Broughton, B. R., Drummond, G. R., and Selemidis, S. (2011) *PLoS pathogens* **7**, e1001271
18. Hsieh, H. P., and Hsu, J. T. (2007) *Current pharmaceutical design* **13**, 3531-3542
19. Lauder, S. N., Taylor, P. R., Clark, S. R., Evans, R. L., Hindley, J. P., Smart, K., Leach, H., Kidd, E. J., Broadley, K. J., Jones, S. A., Wise, M. P., Godkin, A. J., O'Donnell, V., and Gallimore, A. M. (2011) *Thorax* **66**, 368-374
20. Budd, A., Alleva, L., Alsharifi, M., Koskinen, A., Smythe, V., Mullbacher, A., Wood, J., and Clark, I. (2007) *Antimicrobial agents and chemotherapy* **51**, 2965-2968
21. Munoz-Fontela, C., Pazos, M., Delgado, I., Murk, W., Mungamuri, S. K., Lee, S. W., Garcia-Sastre, A., Moran, T. M., and Aaronson, S. A. (2011) *J Immunol* **187**, 6428-6436
22. Josset, L., Textoris, J., Loriod, B., Ferraris, O., Moules, V., Lina, B., N'Guyen, C., Diaz, J. J., and Rosa-Calatrava, M. (2010) *PloS one* **5**
23. Nicholas, S. A., Oniku, A. E., and Sumbayev, V. V. (2010) *Molecular immunology* **48**, 240-247
24. Yamauchi, Y., Boukari, H., Banerjee, I., Sbalzarini, I. F., Horvath, P., and Helenius, A. (2011) *PLoS pathogens* **7**, e1002316
25. Ungheri, D., Pisani, C., Sanson, G., Bertani, A., Schioppacassi, G., Delgado, R., Sironi, M., and Ghezzi, P. (2000) *International journal of immunopathology and pharmacology* **13**, 123-128
26. Krizanova, O., Lacinova, D., and Knopp, J. (1977) *Acta virologica* **21**, 97-103
27. Eierhoff, T., Hrinčius, E. R., Rescher, U., Ludwig, S., and Ehrhardt, C. (2010) *PLoS pathogens* **6**, e1001099
28. Huotari, J., Meyer-Schaller, N., Hubner, M., Stauffer, S., Katheder, N., Horvath, P., Mancini, R., Helenius, A., and Peter, M. (2012) *Proceedings of the National Academy of Sciences of the United States of America*
29. Kumar, N., Liang, Y., and Parslow, T. G. (2011) *Journal of virology* **85**, 2818-2827
30. de Vries, E., Tscherne, D. M., Wienholts, M. J., Cobos-Jimenez, V., Scholte, F., Garcia-Sastre, A., Rottier, P. J., and de Haan, C. A. (2011) *PLoS pathogens* **7**, e1001329
31. Ma, B., Dela Cruz, C. S., Hartl, D., Kang, M. J., Takyar, S., Homer, R. J., Lee, C. G., and Elias, J. A. (2011) *American journal of respiratory and critical care medicine* **183**, 1322-1335
32. Cloutier, A., Marois, I., Cloutier, D., Verreault, C., Cantin, A. M., and Richter, M. V. (2012) *The Journal of infectious diseases*
33. Uetani, K., Hiroi, M., Meguro, T., Ogawa, H., Kamisako, T., Ohmori, Y., and Erzurum, S. C. (2008) *European journal of immunology* **38**, 1559-1573
34. Walsh, K. B., Teijaro, J. R., Rosen, H., and Oldstone, M. B. (2011) *Immunologic research* **51**, 15-25
35. Teijaro, J. R., Walsh, K. B., Cahalan, S., Fremgen, D. M., Roberts, E., Scott, F., Martinborough, E., Peach, R., Oldstone, M. B., and Rosen, H. (2011) *Cell* **146**, 980-991
36. Robinson, D. P., Lorenzo, M. E., Jian, W., and Klein, S. L. (2011) *PLoS pathogens* **7**, e1002149
37. Ge, X., Rameix-Welti, M. A., Gault, E., Chase, G., dos Santos Afonso, E., Picard, D., Schwemmle, M., and Naffakh, N. (2011) *PloS one* **6**, e23368
38. Han, K., Ma, H., An, X., Su, Y., Chen, J., Lian, Z., Zhao, J., Zhu, B. P., Fontaine, R. E., Feng, Z., and Zeng, G. (2011) *Clinical infectious diseases : an official publication of the Infectious Diseases Society of America* **53**, 326-333
39. Pordes, A. G., Baumgartner, C. K., Allacher, P., Ahmad, R. U., Weiller, M., Schiviz, A. N., Schwarz, H. P., and Reipert, B. M. (2011) *Blood* **118**, 3154-3162
40. Jiang, M., Osterlund, P., Sarin, L. P., Poranen, M. M., Bamford, D. H., Guo, D., and Julkunen, I. (2011) *J Immunol* **187**, 1713-1721

41. Cloutier, A., Marois, I., Cloutier, D., Verreault, C., Cantin, A. M., and Richter, M. V. (2012) *The Journal of infectious diseases*
42. Hoffmann, H. H., Kunz, A., Simon, V. A., Palese, P., and Shaw, M. L. (2011) *Proceedings of the National Academy of Sciences of the United States of America* **108**, 5777-5782
43. Puri, A., Riley, J. L., Kim, D., Ritchey, D. W., Hug, P., Jernigan, K., Rose, P., Blumenthal, R., and Carroll, R. G. (2000) *AIDS research and human retroviruses* **16**, 19-25
44. Ito, T., Allen, R. M., Carson, W. F. t., Schaller, M., Cavassani, K. A., Hogaboam, C. M., Lukacs, N. W., Matsukawa, A., and Kunkel, S. L. (2011) *PLoS pathogens* **7**, e1002341
45. Zhirnov, O. P., Ksenofontov, A. L., Kuzmina, S. G., and Klenk, H. D. (2002) *Biochemistry. Biokhimiia* **67**, 534-539
46. Fujioka, Y., Tsuda, M., Hattori, T., Sasaki, J., Sasaki, T., Miyazaki, T., and Ohba, Y. (2011) *PloS one* **6**, e16324
47. Law, A. H., Lee, D. C., Yuen, K. Y., Peiris, M., and Lau, A. S. (2010) *Cellular & molecular immunology* **7**, 263-270
48. Hahon, N., and Ong, T. (1980) *Journal of toxicology and environmental health* **6**, 705-712
49. Nguyen, J. T., Smee, D. F., Barnard, D. L., Julander, J. G., Gross, M., de Jong, M. D., and Went, G. T. (2012) *PloS one* **7**, e31006
50. Tashiro, M., Klenk, H. D., and Rott, R. (1987) *The Journal of general virology* **68** ( Pt 7), 2039-2041
51. Munger, J., Bennett, B. D., Parikh, A., Feng, X. J., McArdle, J., Rabitz, H. A., Shenk, T., and Rabinowitz, J. D. (2008) *Nature biotechnology* **26**, 1179-1186
52. Muller, K. H., Kakkola, L., Nagaraj, A. S., Cheltsov, A. V., Anastasina, M., and Kainov, D. E. (2012) *Trends in pharmacological sciences* **33**, 89-99
53. Guerriero, C. J., and Weisz, O. A. (2007) *American journal of physiology. Cell physiology* **292**, C1562-1566
54. Amorim, M. J., Read, E. K., Dalton, R. M., Medcalf, L., and Digard, P. (2007) *Traffic* **8**, 1-11
55. Ikeda, S., Yazawa, M., and Nishimura, C. (1987) *Antiviral research* **8**, 103-113
56. Suspene, R., Petit, V., Puyraimond-Zemmour, D., Aynaud, M. M., Henry, M., Guetard, D., Rusniok, C., Wain-Hobson, S., and Vartanian, J. P. (2011) *Journal of virology* **85**, 2458-2462
57. Meerveld-Eggink, A., de Weerd, O., van der Velden, A. M., Los, M., van der Velden, A. W., Stouthard, J. M., Nijziel, M. R., Westerman, M., Beeker, A., van Beek, R., Rimmelzwaan, G. F., Rijkers, G. T., and Biesma, D. H. (2011) *Annals of oncology : official journal of the European Society for Medical Oncology / ESMO* **22**, 2031-2035
58. Woerner, A., Sauvain, M. J., Aebi, C., Otth, M., and Bolt, I. B. (2011) *Human vaccines* **7**, 1293-1298
59. Muller, K. H., Kainov, D. E., El Bakkouri, K., Saelens, X., De Brabander, J. K., Kittel, C., Samm, E., and Muller, C. P. (2011) *British journal of pharmacology* **164**, 344-357
