# Supplementary material
Source: PubMed Central journal article supplement (PMC3471742)
Supplement: supp_M112.392142_jbc.M112.392142-2.pdf [file supp_M112.392142_jbc.M112.392142-2.pdf]

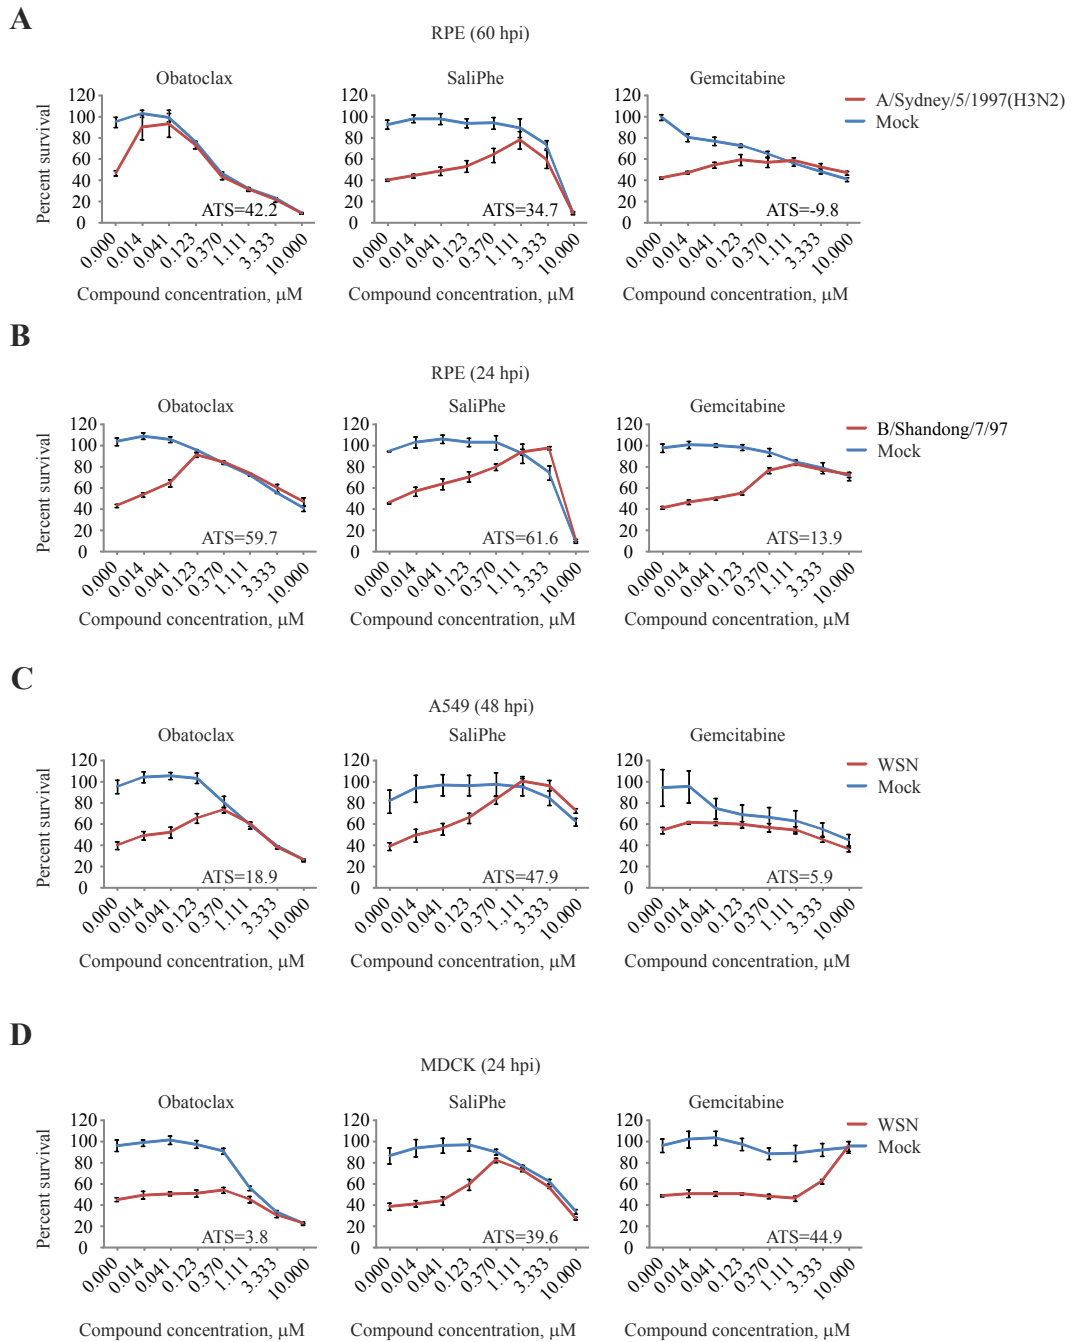

**SUPPLEMENTAL FIGURE S1.** Effect of obatoclox, SaliPhe and gemcitabine on influenza virus infections in dedicated cell lines. RPE, A549 and MDCK cells were treated with increasing concentrations of compounds and infected with A/Sydney/5/1997(H3N2), B/Shandong/7/97 or A/WSN/33 at moi 3 or remained non-infected. Cell viability was measured at indicated time points by CTG assay. The error bars represent the s.d. The ATSs are shown.

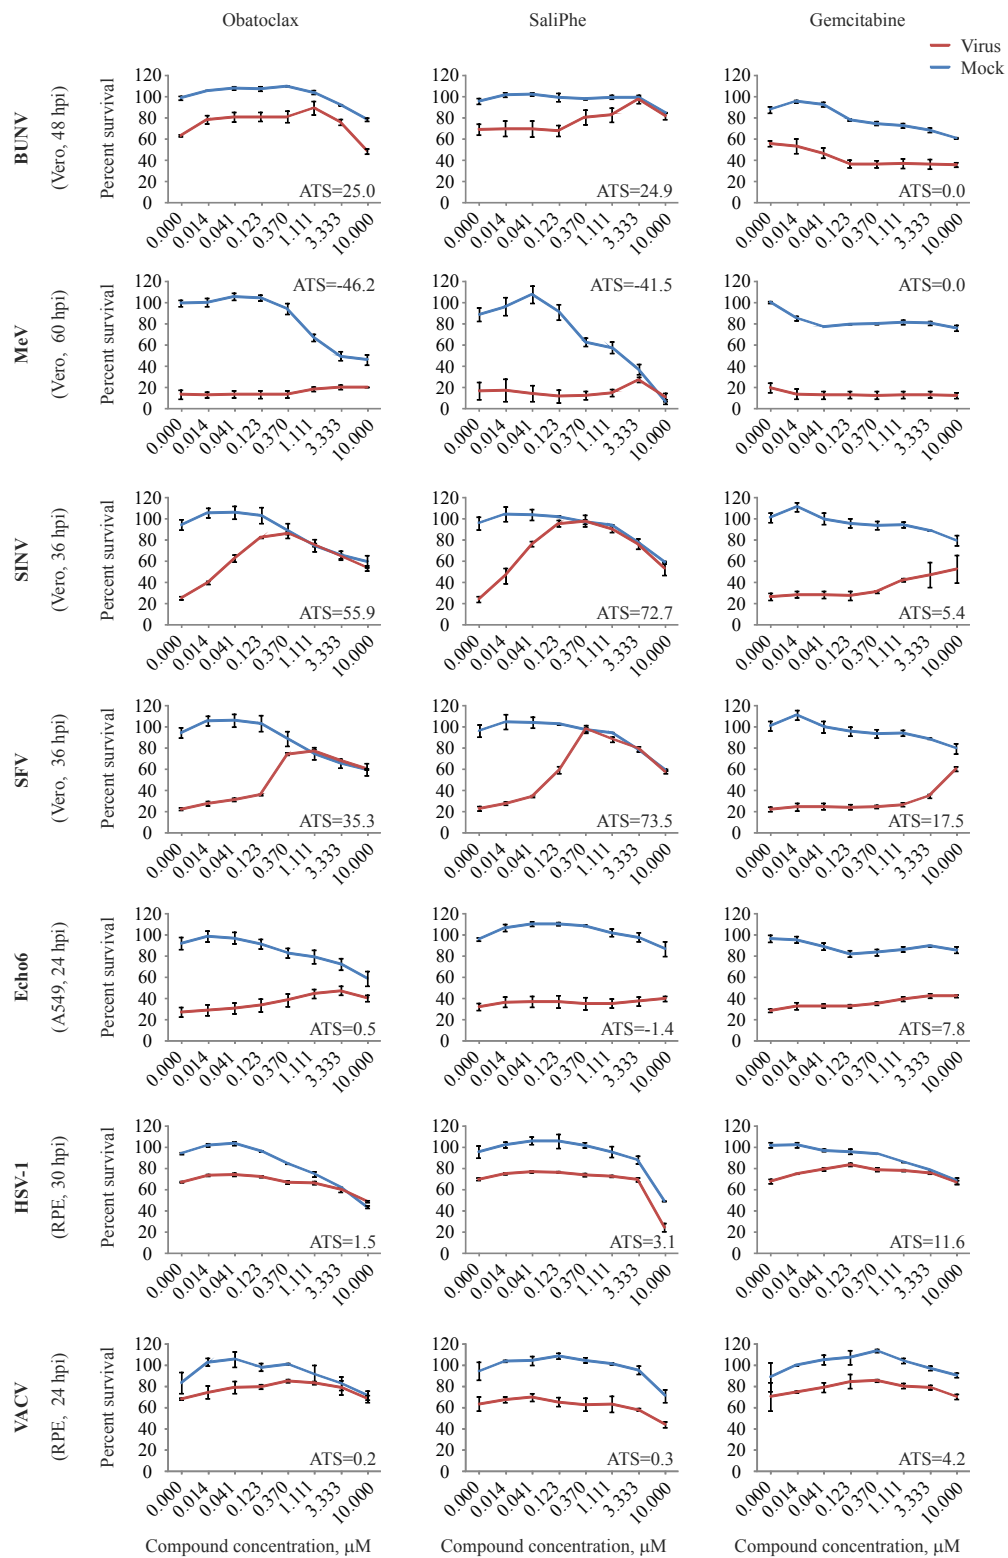

**SUPPLEMENTAL FIGURE S2.** Effect of obatoclax, SaliPhe and gemcitabine on cells infected with different viruses. Dedicated cells were treated with increasing compound concentrations and infected with appropriate virus or remained non-infected. Cell viability was measured at indicated time points by CTG assay. The error bars represent the s.d. The ATSSs are shown.

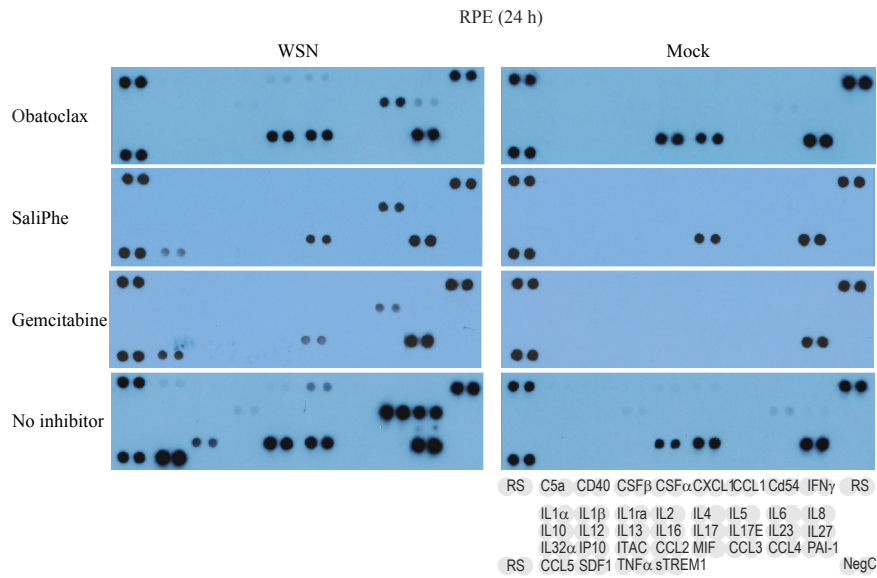

**SUPPLEMENTAL FIGURE S3.** The human cytokine array detects changes in cytokine/chemokines levels in response to compounds, WSN virus or their combinations. Compound-treated on non-treated RPE cells were WSN- or mock-infected. At 24 hpi the supernatants were collected and assayed for chemokines/cytokines levels.
